# Supplementary material for: Molecular Alterations Caused by Alcohol Consumption in the UK Biobank: A Mendelian Randomisation Study
Source: MDPI journal article supplement (doi:10.3390/nu14142943), 2022-07-19
Supplement: s1 [file s1]

## Molecular Alterations Caused by Alcohol Consumption in the UK Biobank: A Mendelian Randomisation Study

Felix O'Farrell <sup>1</sup>, Xiyun Jiang <sup>1</sup>, Shahad Aljifri <sup>1</sup> and Raha Pazoki <sup>1,2,\*</sup>

1 Division of Biomedical Sciences, Department of Life Sciences, College of Health and Life Sciences, Brunel University London, Uxbridge UB8 3PH, UK

2 Department of Epidemiology and Biostatistics, School of Public Health, St Mary's Campus, Norfolk Place, London W2 1PG, UK

\* Correspondence: author: raha.pazoki@brunel.ac.uk

**Table S1. Genetic variants used in Mendelian randomisation analysis.**

| SNP        | effect allele | other allele | effect allele frequency | p value               | effect estimate | standard error | sample size | F-statistics | SNP strength |
|------------|---------------|--------------|-------------------------|-----------------------|-----------------|----------------|-------------|--------------|--------------|
| rs705687   | A             | G            | 0.796                   | $2.2 \times 10^{-01}$ | -0.004          | 0.004          | 221645      | 1.501        | Weak         |
| rs58107686 | C             | A            | 0.344                   | $3.1 \times 10^{-04}$ | -0.013          | 0.004          | 186537      | 12.960       | Strong       |
| rs12088813 | A             | C            | 0.26                    | $2.3 \times 10^{-01}$ | -0.004          | 0.003          | 223144      | 1.472        | Weak         |
| rs5024204  | A             | T            | 0.267                   | $2.0 \times 10^{-02}$ | 0.008           | 0.003          | 220093      | 5.402        | Weak         |
| rs10753661 | G             | A            | 0.702                   | $2.7 \times 10^{-02}$ | -0.007          | 0.003          | 219744      | 4.909        | Weak         |
| rs28680958 | G             | A            | 0.23                    | $3.2 \times 10^{-04}$ | -0.013          | 0.004          | 221508      | 12.991       | Strong       |
| rs823114   | G             | A            | 0.553                   | $1.1 \times 10^{-03}$ | 0.010           | 0.003          | 220432      | 10.633       | Strong       |
| rs77165542 | C             | T            | 0.0283                  | $1.3 \times 10^{-01}$ | -0.013          | 0.009          | 190275      | 2.287        | Weak         |
| rs1260326  | T             | C            | 0.595                   | $4.7 \times 10^{-06}$ | 0.014           | 0.003          | 221214      | 20.796       | Strong       |
| rs2178197  | A             | G            | 0.542                   | $4.6 \times 10^{-01}$ | -0.002          | 0.003          | 224519      | 0.553        | Weak         |
| rs13383034 | C             | T            | 0.336                   | $2.0 \times 10^{-04}$ | 0.012           | 0.003          | 219150      | 13.762       | Strong       |

| SNP        | effect allele | other allele | effect allele frequency | p value               | effect estimate | standard error | sample size | F-statistics | SNP strength |
|------------|---------------|--------------|-------------------------|-----------------------|-----------------|----------------|-------------|--------------|--------------|
| rs13032049 | A             | G            | 0.28                    | $1.4 \times 10^{-06}$ | 0.016           | 0.003          | 219119      | 23.225       | Strong       |
| rs828867   | G             | A            | 0.544                   | $2.3 \times 10^{-02}$ | 0.007           | 0.003          | 215058      | 5.157        | Weak         |
| rs11692435 | G             | A            | 0.0856                  | $1.8 \times 10^{-01}$ | 0.007           | 0.005          | 197923      | 1.789        | Weak         |
| rs13024996 | C             | A            | 0.352                   | $4.8 \times 10^{-03}$ | -0.009          | 0.003          | 221113      | 7.967        | Weak         |
| rs72859280 | G             | T            | 0.0355                  | $2.7 \times 10^{-05}$ | 0.035           | 0.008          | 210722      | 17.638       | Strong       |
| rs56337305 | T             | C            | 0.375                   | $5.0 \times 10^{-04}$ | -0.011          | 0.003          | 219788      | 12.000       | Strong       |
| rs13094887 | A             | T            | 0.286                   | $3.7 \times 10^{-02}$ | -0.007          | 0.003          | 220966      | 4.335        | Weak         |
| rs62250685 | A             | G            | 0.612                   | $5.5 \times 10^{-05}$ | -0.012          | 0.003          | 220967      | 16.208       | Strong       |
| rs13066454 | C             | T            | 0.401                   | $1.4 \times 10^{-01}$ | -0.005          | 0.003          | 219462      | 2.216        | Weak         |
| rs9838144  | G             | C            | 0.194                   | $7.4 \times 10^{-02}$ | -0.007          | 0.004          | 217833      | 3.208        | Weak         |
| rs2011092  | T             | C            | 0.314                   | $6.1 \times 10^{-01}$ | -0.002          | 0.003          | 223636      | 0.253        | Weak         |
| rs60654199 | C             | A            | 0.067                   | $6.6 \times 10^{-04}$ | -0.022          | 0.006          | 216549      | 11.639       | Strong       |
| rs6787172  | T             | G            | 0.546                   | $8.5 \times 10^{-05}$ | -0.012          | 0.003          | 222544      | 15.312       | Strong       |
| rs3748034  | G             | T            | 0.133                   | $5.9 \times 10^{-05}$ | -0.017          | 0.004          | 196985      | 16.038       | Strong       |
| rs7682824  | C             | T            | 0.217                   | $4.2 \times 10^{-03}$ | -0.010          | 0.003          | 123149      | 8.216        | Weak         |
| rs11940694 | A             | G            | 0.595                   | $4.8 \times 10^{-14}$ | 0.023           | 0.003          | 222804      | 56.745       | Strong       |
| rs4501255  | C             | G            | 0.236                   | $6.7 \times 10^{-03}$ | 0.009           | 0.004          | 221053      | 7.352        | Weak         |
| rs12499107 | A             | G            | 0.123                   | $5.2 \times 10^{-01}$ | 0.003           | 0.004          | 219969      | 0.410        | Weak         |
| rs1229984  | T             | C            | 0.953                   | $1.1 \times 10^{-65}$ | 0.145           | 0.008          | 203476      | 294.457      | Strong       |
| rs10028756 | G             | A            | 0.126                   | $1.5 \times 10^{-01}$ | -0.007          | 0.005          | 216539      | 2.125        | Weak         |
| rs36052336 | A             | G            | 0.0519                  | $1.0 \times 10^{-02}$ | -0.016          | 0.006          | 215241      | 6.652        | Weak         |
| rs2165670  | G             | A            | 0.0984                  | $2.0 \times 10^{-08}$ | 0.026           | 0.005          | 221948      | 31.517       | Strong       |
| rs79139602 | A             | T            | 0.0339                  | $4.6 \times 10^{-01}$ | 0.008           | 0.010          | 220441      | 0.544        | Weak         |

| SNP        | effect allele | other allele | effect allele frequency | p value               | effect estimate | standard error | sample size | F-statistics | SNP strength |
|------------|---------------|--------------|-------------------------|-----------------------|-----------------|----------------|-------------|--------------|--------------|
| rs4699791  | G             | A            | 0.114                   | $6.4 \times 10^{-01}$ | 0.002           | 0.005          | 216148      | 0.215        | Weak         |
| rs13107325 | C             | T            | 0.0654                  | $1.3 \times 10^{-07}$ | -0.035          | 0.007          | 217038      | 27.784       | Strong       |
| rs4690727  | C             | G            | 0.728                   | $3.9 \times 10^{-04}$ | 0.012           | 0.003          | 224095      | 12.724       | Strong       |
| rs10004020 | G             | A            | 0.705                   | $3.8 \times 10^{-01}$ | 0.003           | 0.003          | 224239      | 0.773        | Weak         |
| rs12651313 | C             | G            | 0.463                   | $4.7 \times 10^{-03}$ | -0.008          | 0.003          | 223005      | 7.987        | Weak         |
| rs4916723  | A             | C            | 0.404                   | $2.0 \times 10^{-03}$ | -0.009          | 0.003          | 219877      | 9.587        | Weak         |
| rs12655091 | G             | A            | 0.508                   | $2.8 \times 10^{-04}$ | -0.011          | 0.003          | 223535      | 13.135       | Strong       |
| rs55872084 | G             | T            | 0.218                   | $2.2 \times 10^{-08}$ | 0.020           | 0.004          | 222708      | 31.247       | Strong       |
| rs10085696 | A             | G            | 0.201                   | $1.6 \times 10^{-04}$ | -0.015          | 0.004          | 225774      | 14.258       | Strong       |
| rs6460047  | T             | C            | 0.203                   | $6.4 \times 10^{-02}$ | 0.007           | 0.004          | 215693      | 3.432        | Weak         |
| rs10236149 | A             | G            | 0.17                    | $3.0 \times 10^{-03}$ | -0.014          | 0.005          | 220984      | 8.779        | Weak         |
| rs35034355 | G             | A            | 0.486                   | $2.1 \times 10^{-03}$ | -0.009          | 0.003          | 224533      | 9.469        | Weak         |
| rs6951574  | T             | C            | 0.459                   | $3.5 \times 10^{-03}$ | 0.009           | 0.003          | 207047      | 8.505        | Weak         |
| rs13250583 | C             | T            | 0.204                   | $8.0 \times 10^{-03}$ | -0.010          | 0.004          | 224238      | 7.038        | Weak         |
| rs1217091  | T             | C            | 0.81                    | $3.9 \times 10^{-03}$ | 0.011           | 0.004          | 218773      | 8.356        | Weak         |
| rs28601761 | C             | G            | 0.405                   | $4.4 \times 10^{-05}$ | 0.012           | 0.003          | 218148      | 16.588       | Strong       |
| rs55932213 | A             | G            | 0.701                   | $9.3 \times 10^{-03}$ | 0.009           | 0.003          | 218281      | 6.757        | Weak         |
| rs10978550 | T             | C            | 0.205                   | $7.8 \times 10^{-02}$ | -0.006          | 0.004          | 223278      | 3.101        | Weak         |
| rs7074871  | G             | A            | 0.254                   | $3.2 \times 10^{-03}$ | -0.010          | 0.003          | 225774      | 8.721        | Weak         |
| rs17665139 | C             | T            | 0.144                   | $3.5 \times 10^{-03}$ | -0.012          | 0.004          | 225644      | 8.519        | Weak         |
| rs7950166  | C             | T            | 0.614                   | $2.4 \times 10^{-03}$ | -0.009          | 0.003          | 224871      | 9.235        | Weak         |
| rs11030084 | C             | T            | 0.198                   | $3.8 \times 10^{-03}$ | -0.011          | 0.004          | 224959      | 8.395        | Weak         |
| rs56030824 | G             | A            | 0.317                   | $5.0 \times 10^{-05}$ | -0.013          | 0.003          | 219170      | 16.449       | Strong       |

| SNP         | effect allele | other allele | effect allele frequency | p value               | effect estimate | standard error | sample size | F-statistics | SNP strength |
|-------------|---------------|--------------|-------------------------|-----------------------|-----------------|----------------|-------------|--------------|--------------|
| rs10750025  | C             | T            | 0.698                   | $2.7 \times 10^{-04}$ | 0.012           | 0.003          | 220854      | 13.325       | Strong       |
| rs1713676   | A             | G            | 0.522                   | $1.9 \times 10^{-02}$ | -0.007          | 0.003          | 223561      | 5.502        | Weak         |
| rs4938230   | C             | A            | 0.837                   | $3.9 \times 10^{-03}$ | 0.012           | 0.004          | 222828      | 8.361        | Weak         |
| rs682011    | T             | C            | 0.567                   | $8.7 \times 10^{-03}$ | 0.008           | 0.003          | 222378      | 6.899        | Weak         |
| rs12795042  | A             | C            | 0.621                   | $2.3 \times 10^{-05}$ | -0.013          | 0.003          | 214048      | 17.973       | Strong       |
| rs10876188  | C             | T            | 0.466                   | $7.1 \times 10^{-03}$ | -0.008          | 0.003          | 224376      | 7.231        | Weak         |
| rs3809162   | A             | G            | 0.414                   | $2.3 \times 10^{-03}$ | 0.009           | 0.003          | 218440      | 9.299        | Weak         |
| rs10506274  | G             | T            | 0.458                   | $1.1 \times 10^{-02}$ | -0.008          | 0.003          | 224459      | 6.487        | Weak         |
| rs4842786   | G             | A            | 0.588                   | $1.8 \times 10^{-06}$ | -0.015          | 0.003          | 220405      | 22.750       | Strong       |
| rs500321    | A             | T            | 0.729                   | $1.2 \times 10^{-03}$ | -0.011          | 0.003          | 220776      | 10.654       | Strong       |
| rs1123285   | C             | G            | 0.339                   | $1.7 \times 10^{-03}$ | -0.010          | 0.003          | 221889      | 9.920        | Weak         |
| rs2180870   | T             | C            | 0.132                   | $1.5 \times 10^{-04}$ | -0.017          | 0.004          | 218628      | 14.358       | Strong       |
| rs28929474  | C             | T            | 0.0154                  | $1.9 \times 10^{-03}$ | -0.036          | 0.012          | 217304      | 9.626        | Weak         |
| rs11625650  | G             | A            | 0.24                    | $4.9 \times 10^{-03}$ | -0.010          | 0.004          | 180176      | 7.959        | Weak         |
| rs2472297   | C             | T            | 0.206                   | $9.4 \times 10^{-03}$ | 0.009           | 0.003          | 204466      | 6.769        | Weak         |
| rs12907323  | A             | G            | 0.423                   | $8.9 \times 10^{-03}$ | 0.008           | 0.003          | 220126      | 6.850        | Weak         |
| rs2764771   | G             | A            | 0.324                   | $7.8 \times 10^{-03}$ | 0.008           | 0.003          | 221589      | 7.067        | Weak         |
| rs17177078  | C             | T            | 0.0664                  | $2.0 \times 10^{-03}$ | -0.019          | 0.006          | 219671      | 9.585        | Weak         |
| rs378421    | G             | A            | 0.405                   | $3.7 \times 10^{-07}$ | -0.015          | 0.003          | 211061      | 25.832       | Strong       |
| rs113443718 | G             | A            | 0.282                   | $9.7 \times 10^{-03}$ | -0.008          | 0.003          | 201951      | 6.667        | Weak         |
| rs62044525  | C             | G            | 0.172                   | $3.2 \times 10^{-05}$ | -0.016          | 0.004          | 219063      | 17.202       | Strong       |
| rs7185555   | G             | C            | 0.141                   | $5.6 \times 10^{-05}$ | -0.017          | 0.004          | 218108      | 16.228       | Strong       |
| rs79616692  | G             | C            | 0.11                    | $1.1 \times 10^{-03}$ | 0.016           | 0.005          | 220007      | 10.619       | Strong       |

| SNP        | effect allele | other allele | effect allele frequency | p value               | effect estimate | standard error | sample size | F-statistics | SNP strength |
|------------|---------------|--------------|-------------------------|-----------------------|-----------------|----------------|-------------|--------------|--------------|
| rs1104608  | G             | C            | 0.418                   | $1.8 \times 10^{-02}$ | -0.007          | 0.003          | 207406      | 5.590        | Weak         |
| rs4548913  | G             | A            | 0.621                   | $1.7 \times 10^{-01}$ | -0.004          | 0.003          | 216859      | 1.911        | Weak         |
| rs3803800  | A             | G            | 0.772                   | $4.6 \times 10^{-03}$ | 0.010           | 0.004          | 215507      | 7.959        | Weak         |
| rs2854334  | A             | G            | 0.608                   | $8.8 \times 10^{-05}$ | 0.012           | 0.003          | 220715      | 15.323       | Strong       |
| rs10438820 | C             | T            | 0.685                   | $3.0 \times 10^{-04}$ | 0.012           | 0.003          | 224723      | 13.102       | Strong       |
| rs9950000  | C             | T            | 0.411                   | $2.6 \times 10^{-02}$ | -0.007          | 0.003          | 224879      | 5.000        | Weak         |
| rs4092465  | A             | G            | 0.61                    | $4.9 \times 10^{-05}$ | -0.013          | 0.003          | 210391      | 16.578       | Strong       |
| rs281379   | G             | A            | 0.477                   | $6.1 \times 10^{-09}$ | 0.017           | 0.003          | 218248      | 33.930       | Strong       |
| rs4815364  | G             | A            | 0.628                   | $1.8 \times 10^{-02}$ | 0.007           | 0.003          | 214401      | 5.556        | Weak         |
| rs9607814  | C             | A            | 0.212                   | $1.1 \times 10^{-01}$ | -0.007          | 0.004          | 186672      | 2.580        | Weak         |
